# Supplementary material for: Anthropometry, carbohydrate and lipid metabolism in the East Flanders Prospective Twin Survey: heritabilities
Source: Springer Nature journal article supplement (doi:10.1007/s00125-007-0784-z), 2007-08-10
Supplement: MOESM1 [file 8087186]

## **Electronic supplementary material**

### **Methods**

*Phenotypic measurements* Between February 1997 and April 2000, the twins visited the research centre in Leuven for a 2 h examination, which started in the morning after an overnight fast. Participants were measured barefoot and lightly clothed. Standing height (cm) was measured to the nearest 0.1 cm with a Harpenden fixed stadiometer (Holtain, Crosswell, UK). Body mass (kg) was measured on a balance scale (SECA, Hamburg, Germany) to the nearest 0.1 kg. BMI was calculated as body mass divided by the square of height ( $\text{kg}/\text{m}^2$ ). Waist and hip circumferences were measured with a flexible steel tape to 1 mm accuracy. Waist circumference was taken at the smallest point between the costal margin and the iliac crest and hip circumference at the widest part of the hips, generally at the level of the greater trochanters. WHR was expressed as a percentage. Lean body mass was measured using a bioelectrical impedance analyser (BIA310; Biodynamics, Seattle, WA, USA). Fat mass (kg) was calculated by subtracting the value for lean body mass from total body mass. Four skinfold thicknesses were taken in duplicate, to 0.1 mm accuracy with a Harpenden skinfold calliper (British Indicators, St Albans, UK) at the biceps, triceps, subscapular and suprailiac. The four skinfold thickness measurements were summed to evaluate the overall subcutaneous fat level. Blood samples were drawn to measure plasma hormone concentrations. Plasma leptin was measured with an immunoradiometric assay in a coated tube (Diagnostic Systems Laboratories, Webster, TX, USA). Plasma lipids (triacylglycerol, total cholesterol and HDL-cholesterol) were measured on an auto-analyser (AU600; Olympus, Kyoto, Japan). LDL-cholesterol was estimated using Friedewald's formula [1]. NEFA were measured using a colorimetric assay with the optical density measured at 550 nmol/l. Plasma glucose was measured using the hexokinase method (Olympus AU600). Plasma insulin was determined using a microparticle enzyme immunoassay (AxSYM; Abbott Laboratories, Chicago, IL,

USA). IGFBP-1 was measured by radioimmunoassay, as described [2]. Homeostasis model assessment (HOMA) was used to assess insulin resistance and beta cell function [3].

## **References**

1. Friedewald WT, Levy RI and Fredrickson DS (1972) Estimation of the concentration of low-density lipoprotein cholesterol in plasma, without use of the preparative ultracentrifuge. *Clin Chem* 18:499–502
2. Verhaeghe J, Coopmans W, van Herck E, van Schoubroeck D, Deprest JA and Witters I (1999) IGF-I, IGF-II, IGF binding protein 1, and C-peptide in second trimester amniotic fluid are dependent on gestational age but do not predict weight at birth. *Pediatr Res* 46:101–108
3. Levy JC, Matthews DR and Hermans MP (1998) Correct homeostasis model assessment (HOMA) evaluation uses the computer program. *Diabetes Care* 21:2191–2192

**ESM Table 1** Twin studies (>200 twin pairs) estimating heritabilities ( $H^2$ , expressed in percentage) of obesity parameters, fasting glucose, fasting insulin and lipid levels in adults

| Reference           | Registry                      | Pairs (n) | Age (years) |       | Adjustment                   | Sex | $H^2$ |       |     |      |      |    |       |    |     |     |     |
|---------------------|-------------------------------|-----------|-------------|-------|------------------------------|-----|-------|-------|-----|------|------|----|-------|----|-----|-----|-----|
|                     |                               |           | Mean        | Range |                              |     | BM    | BMI   | WHR | S4SF | FATM | FG | FI    | TC | HDL | LDL | TRG |
| [4] <sup>a</sup>    | Eight registries <sup>b</sup> | 36,295    | –           | 20–39 | Age                          | M   | –     | 45–84 | –   | –    | –    | –  | –     | –  | –   | –   | –   |
|                     |                               |           |             |       | Age                          | W   | –     | 64–85 | –   | –    | –    | –  | –     | –  | –   | –   | –   |
| [5]                 | Virginia                      | 5,588     | –           | –     | –                            | M   | –     | 72    | –   | –    | –    | –  | –     | –  | –   | –   | –   |
|                     |                               |           |             |       | –                            | W   | –     | 75    | –   | –    | –    | –  | –     | –  | –   | –   | –   |
| [5] <sup>a</sup>    | Australia                     | 3,569     | –           | –     | –                            | M   | –     | 70–80 | –   | –    | –    | –  | –     | –  | –   | –   | –   |
|                     |                               |           |             |       | –                            | W   | –     | 69–78 | –   | –    | –    | –  | –     | –  | –   | –   | –   |
| [6] <sup>a</sup>    | Danish                        | 1,233     | –           | 46–76 | Age, zygosity                | M   | –     | 46–61 | –   | –    | –    | –  | –     | –  | –   | –   | –   |
|                     |                               |           |             |       | Age, zygosity                | W   | –     | 75–77 | –   | –    | –    | –  | –     | –  | –   | –   | –   |
| [7]                 | Danish                        | 303       | 67          | 55–74 | –                            | M   | –     | 58    | 22  | –    | –    | –  | 36    | –  | 56  | –   | 50  |
|                     |                               |           |             |       | –                            | W   | –     | 90    | 10  | –    | –    | –  | 14    | –  | 84  | –   | 34  |
| [8]                 | Danish                        | 624       | 38          | 18–67 | Age                          | M   | –     | 63    | –   | 65   | 63   | –  | –     | –  | –   | –   | –   |
|                     |                               |           |             |       | Age                          | W   | –     | 58    | –   | 61   | 59   | –  | –     | –  | –   | –   | –   |
| [9]                 | Finnish                       | 7245      | 31          | 18–54 | Age                          | M   | –     | 72    | –   | –    | –    | –  | –     | –  | –   | –   | –   |
|                     |                               |           |             |       | Age                          | W   | –     | 68    | –   | –    | –    | –  | –     | –  | –   | –   | –   |
| [10] <sup>c</sup>   | KPWTS                         | 434       | 42          | –     | Age                          | W   | –     | 89    | –   | –    | –    | –  | –     | –  | 68  | 98  | 80  |
|                     |                               |           |             |       | Age, environment, BMI        | W   | –     | –     | –   | –    | –    | –  | –     | –  | 69  | 91  | 51  |
| [11] <sup>a</sup>   | KPWTS                         | 315       | 41, 51      | 18–91 | –                            | W   | –     | 79–80 | –   | –    | –    | –  | –     | –  | –   | –   | –   |
| [12] <sup>a</sup>   | Minnesota                     | 1,033     | –           | 18–81 | Sex                          | M/W | 70–86 | 63–82 | –   | –    | –    | –  | –     | –  | –   | –   | –   |
| [13] <sup>c</sup>   | NAS-NRC                       | 514       | –           | 42–56 | –                            | M   | 56    | 64    | –   | –    | –    | –  | 43    | 46 | 57  | 56  | –   |
| [14] <sup>a,c</sup> | NAS-NRC                       | 4,071     | –           | 15–53 | –                            | M   | 78–81 | 77–84 | –   | –    | –    | –  | –     | –  | –   | –   | –   |
| [15] <sup>c</sup>   | NAS-NRC                       | 265       | –           | 59–70 | BMI                          | M   | –     | 63    | 31  | –    | –    | –  | –     | –  | –   | –   | –   |
| [16] <sup>a</sup>   | NAS-NRC                       | 243       | –           | 20–63 | –                            | M   | –     | 73–82 | –   | –    | –    | –  | –     | –  | –   | –   | –   |
| [17]                | Swedish                       | 289       | 66          | 52–86 | Sex, age                     | M/W | –     | 52    | –   | –    | –    | –  | –     | –  | 54  | –   | 43  |
| [18]                | Swedish                       | 318       | 65          | 45–85 | Age                          | M   | –     | 58    | 28  | –    | –    | –  | 27    | –  | –   | –   | –   |
|                     |                               |           |             |       | Age                          | W   | –     | 73    | 49  | –    | –    | –  | 49    | –  | –   | –   | –   |
| [19]                | Swedish                       | 673       | 59          | –     | Age                          | M   | –     | 74    | –   | –    | –    | –  | –     | –  | –   | –   | –   |
|                     |                               |           |             |       | Age                          | W   | –     | 69    | –   | –    | –    | –  | –     | –  | –   | –   | –   |
| [20]                | Norwegian                     | 2,570     | –           | 18–25 | –                            | M   | –     | 71    | –   | –    | –    | –  | –     | –  | –   | –   | –   |
|                     |                               |           |             |       | –                            | W   | –     | 79    | –   | –    | –    | –  | –     | –  | –   | –   | –   |
| [21]                | German                        | 222       | 34          | –     | –                            | M/W | 89    | 97    | –   | –    | –    | –  | 64    | 59 | 66  | 72  | –   |
| [22]                | Danish                        | 607       | 38          | 18–67 | Age                          | M   | –     | –     | –   | –    | –    | 38 | 37    | –  | –   | –   | –   |
|                     |                               |           |             |       | Age                          | W   | –     | –     | –   | –    | –    | 12 | 54    | –  | –   | –   | –   |
| [23]                | Dutch                         | 209       | 44          | 34–63 | Sex, assay batch, truncation | M/W | –     | –     | –   | –    | –    | 50 | 20–25 | –  | –   | –   | –   |

|                   |                               |       |        |       |                         |     |    |    |    |    |    |    |    |       |       |       |       |
|-------------------|-------------------------------|-------|--------|-------|-------------------------|-----|----|----|----|----|----|----|----|-------|-------|-------|-------|
| [24] <sup>c</sup> | KPWTS                         | 278   | 51     | 30–91 | Age, behaviour, BMI     | W   | –  | –  | –  | –  | –  | –  | 54 | –     | –     | –     | –     |
| [25] <sup>a</sup> | Three registries <sup>d</sup> | 1,859 | –      | 28–92 | Sex, age                | M/W | –  | –  | –  | –  | –  | –  | –  | 57–77 | 62–72 | 61–77 | 48–62 |
| [26]              | Australia                     | 205   | 23     | 18–34 | –                       | M   | –  | –  | –  | –  | –  | –  | –  | 54    | 24    | –     | 53    |
|                   |                               |       |        |       | –                       | W   | –  | –  | –  | –  | –  | –  | –  | 54    | 24    | –     | 51    |
| [27]              | Dutch                         | 203   | 44     | 34–63 | Sex, age                | M/W | –  | –  | –  | –  | –  | –  | –  | 68    | 71    | 69    | 59    |
| [28] <sup>a</sup> | KPWTS                         | 348   | 41, 51 | –     | Age                     | W   | –  | –  | –  | –  | –  | –  | –  | 63–66 | 73    | 65    | 50–65 |
| [29]              | St Thomas', UK                | 1,733 | 48     | 18–79 | Age, fas, HRT, MPS      | W   | –  | –  | –  | –  | –  | –  | –  | 42    | 42    | 46    | 63    |
| [30] <sup>a</sup> | Swedish                       | 302   | 66     | 52–86 | Sex, age                | M/W | –  | –  | –  | –  | –  | –  | –  | 32–63 | 55–76 | –     | 28–72 |
| [31] <sup>a</sup> | Swedish                       | 725   | –      | 17–85 | Med, fas, dia, sex, age | M/W | –  | –  | –  | –  | –  | –  | –  | 49–65 | –     | –     | 19–62 |
| [32]              | Pittsburgh                    | 204   | 21     | 18–30 | Age, sex, eth, BMI, nut | M/W | –  | –  | –  | –  | –  | –  | –  | 68    | 67    | 78    | 51    |
| [33] <sup>a</sup> | Australia                     | 208   | –      | 18–47 | Sex, age                | M/W | –  | –  | –  | –  | –  | –  | –  | 50–83 | –     | –     | –     |
| [34]              | Danish                        | 756   | –      | –     | Age                     | M   | –  | –  | –  | –  | –  | –  | –  | 74    | 34    | 71    | 0     |
|                   |                               |       |        |       | Age                     | W   | –  | –  | –  | –  | –  | –  | –  | 74    | 54    | 71    | 60    |
| [39]              | KPWTS                         | 340   | 52     | 31–90 | Age                     | W   | –  | –  | 52 | –  | –  | –  | –  | –     | –     | –     | –     |
| [40]              | Minnesota                     | 4,020 | 40     | 28–52 | Age                     | M   | 61 | –  | –  | –  | –  | –  | –  | –     | –     | –     | –     |
|                   |                               |       |        |       | Age                     | W   | 73 | –  | –  | –  | –  | –  | –  | –     | –     | –     | –     |
| Present study     | Belgian (EFPTS)               | 378   | 25     | 18–34 | See Table 3             | M   | 84 | 85 | 70 | 74 | 81 | 67 | 49 | 75    | 76    | 78    | 58    |
|                   |                               |       |        |       |                         | W   | 74 | 75 | 70 | 74 | 70 | 67 | 49 | 75    | 76    | 78    | 58    |

<sup>a</sup>In these studies heritabilities between different age groups are compared; in the table the range is presented

<sup>b</sup>Australian, Danish, Finnish, Italian, Dutch, Norwegian, Swedish and the St Thomas' UK twin registry

<sup>c</sup>Classical heritability estimates: calculated as twice the difference of the MZ and DZ intra-class correlations

<sup>d</sup>Australian, Swedish and the Dutch twin registry

behav, behaviour; BM, body mass; dia, diabetes; env, environment; eth, ethnicity; fas, fasting; FATM, fat mass; FG, fasting glucose; FI, fasting insulin; HRT, hormone replacement therapy; KPWTS, Kaiser-Permanente Women Twins Study; Med, medication; MPS, menopausal status; NAS-NRC, National Academy of Sciences—National Research Council; nut, nutrition; S4SF, sum of four skinfold thicknesses; TC, total cholesterol; TRG, triacylglycerol  
–, not determined or unknown
